# Supplementary material for: Effects of different drying methods on smears of canine blood and effusion fluid
Source: PeerJ. 2020 Oct 27;8:e10092. doi: 10.7717/peerj.10092 (PMC7597622; doi:10.7717/peerj.10092)
Supplement: Supplemental Information 2 [file peerj-08-10092-s002.xlsx]

## Sheet: Compiled data
						Scoring - Red Blood Cells						Scoring - White Blood Cells						Scoring - Platelets						Scoring - Echinocytes						Comments
Sample Type	Hospital Service	Slide Code	Drying Sequence	Drying Method		Eval 1	Eval 2	Eval 3	Eval 4	Eval 5		Eval 1	Eval 2	Eval 3	Eval 4	Eval 5		Eval 1	Eval 2	Eval 3	Eval 4	Eval 5		Eval 1	Eval 2	Eval 3	Eval 4	Eval 5		Eval 1	Eval 1 general observations (present on at least 3 slides)	Eval 2	Eval 2 general observations	Eval 3	Eval 4	Eval 5	Eval 5 general observations
Blood	Comm Pract	AA1	4	Air-Dry		1	1	1	3	3		1	1	1	1	1		1	1	1	1	1		1	1	1	1	1			RBCs hemolyzed @ feathered edge, minimal central pallor; hairlike projections on many platelets		sample appears to be lipemic	Erythrocytes were was light staining	20+ smudge RBCs/100x hpf; RBCs otherwise showing distorted shape --> interfere with dx interpretation -- suspect lipemia artifact	Cell rounding 3+	Lipemia artifact evident (frequent smudged-out erythrocytes diffusely throughout slides), which I think hinders my evaluation more than any drying artifacts
Blood	Comm Pract	AA2	1	CoolShot		1	1	1	3	3		1	1	1	1	1		1	1	1	1	1		1	1	1	1	1						Erythrocytes were dark staining.	20+ smudge RBCs/100x hpf; RBCs otherwise showing distorted shape --> interfere with dx interpretation -- suspect lipemia artifact	Cell rounding 3+
Blood	Comm Pract	AA3	3	Heat Block		3	2	3	3	3		1	2	1	1	2		1	1	1	1	1		1	1	1	1	1		Many RBCs lack crisp margins and have an indistinct morphology, in some areas RBCs have 1 or 2 Heinz body-like inclusions (but more distinct and sometimes larger); more lacunae in the body of the smear than the other slides; occasional foci of what could be fibrin		RBCs clustered and dark, difficult to see central pallor, halo around RBC's, white spots on RBC's; lymphs appear disturbed, no distinct nuclear or cytoplasmic margins, cytoplasm is gray and not smooth		Erythrocytes were dark staining. There was moderate stain precipitate. Focal areas where Red cells are in closer proximity, even overlapping suggestive of agglutination. Red cell borders are not as clear as other areas of the slide. Has a hemolyzed appearance.	20+ smudge RBCs/100x hpf; RBCs otherwise showing distorted shape --> interfere with dx interpretation -- suspect lipemia artifact	Cell rounding 3+; Moisture droplets 2+; Refractile artifact 1+
Blood	Comm Pract	AA4	2	Hair Dryer		1	1	1	3	2		1	1	1	1	1		1	1	1	1	1		1	1	1	1	1				RBCs appear to have stained lighter		Erythrocytes were light staining.	20+ smudge RBCs/100x hpf; RBCs otherwise showing distorted shape --> interfere with dx interpretation -- suspect lipemia artifact	Cell rounding 2+
Blood	Comm Pract	BB1	2	CoolShot		1	1	1	2	2		1	1	1	3	1		1	1	1	1	1		1	2	1	2	2			RBCs hemolyzed @ feathered edge, minimal central pallor			Darker Staining RBCs. Distrubted feathered edge- Chunk missing	WBCs are poorly preserved, difficult to evaluate; Echinocytes are slightly/softly spiculated	Cell rounding 1+; Moisture droplets 1+
Blood	Comm Pract	BB2	3	Hair Dryer		1	1	1	2	1		1	1	1	3	1		1	1	1	1	1		2	1	1	2	2						Darker staining RBCs.	WBCs are poorly preserved, difficult to evaluate; Echinocytes are /softly spiculated	Moisture droplets 1+
Blood	Comm Pract	BB3	1	Heat Block		1	1	2	2	2		1	1	1	2	1		1	1	1	1	1		2	2	1	2	2						Light staining RBCs. About 4.8 echinocytes /100x field.	WBCs are slightly poorly preserved, but OK to interpret; Echinocytes are /softly spiculated
Blood	Comm Pract	BB4	4	Air-Dry		1	1	1	2	2		1	1	1	2	1		1	1	1	1	1		2	2	1	2	3						Light staining RBCs. 7 echinocytes/hpf	WBCs are slightly poorly preserved, but OK to interpret; Echinocytes are /softly spiculated	Cell rounding 1+
Blood	Comm Pract	CC1	3	CoolShot		2	1	1	2	1		1	1	1	2	1		1	1	1	1	1		1	1	1	1	1		Moderate # of RBCs have "punched out" central pallor and/or Heinz body-like inclusions similar to AA3				Darker Staining RBCs.	Roughly 5 RBC smudge cells/100x hpf; WBCs are slightly poorly preserved, but OK to interpret
Blood	Comm Pract	CC2	2	Heat Block		3	2	3	3	3		1	1	1	2	1		1	1	1	1	1		1	1	1	1	1		Indistinct RBC morphology, similar to AA3, and some foci where RBCs appear to be lysed		RBCs clustered and dark, difficult to see central pallor, halo around RBC's		Erythrocytes appear swollen, with a darker rim around the outer edge, with less clear cell borders. Background is more proteinaceous than the other 3 methods. RBCs appear to be in closer proximity to each other almost like agglutination.	Vitrually all RBCs are smudge cells - unable to interpret; WBCs are slightly poorly preserved, but OK to interpret	Cell rounding 2+; Moisture droplets 3+
Blood	Comm Pract	CC3	4	Hair Dryer		2	1	1	2	1		1	1	1	2	1		1	1	1	1	1		1	1	1	1	1		Like CC1 but not as numerous; occasional stomatocytes				Darker staining erythrocytes.	Roughly 5 RBC smudge cells/100x hpf; WBCs are slightly poorly preserved, but OK to interpret
Blood	Comm Pract	CC4	1	Air-Dry		2	1	1	1	1		1	1	1	1	1		1	1	1	1	1		1	1	1	1	1		Like CC3		RBCs appear to have stained lighter		light staining RBCs.	Rare smudge cells
Blood	Comm Pract	DD1	3	Heat Block		2	2	2	3	3		2	1	1	2	2		1	1	1	1	1		1	1	1	1	1		In many areas RBCs have indistinct morphology similar to AA3 and CC2, and even in areas with less artifact the RBCs occasionally have Heinz body-like inclusions similar to those in some previous samples; subtle alteration to WBC morphology compared to other smears; platelets often have hairlike projections		RBCs clustered and dark, difficult to see central pallor, halo around RBC's		Similar to CC method 2. Red cells are in closer proximity. Not close close to suspect agglutination, but not as evenly space as DD methods 2-4. Red cell borders are not as clear. Has a hemolyzed appearance.	Vitrually all RBCs are smudge cells - unable to interpret; WBCs are slightly poorly preserved, but OK to interpret	Cell rounding 3+; Moisture droplets 3+
Blood	Comm Pract	DD2	1	Hair Dryer		2	1	1	2	3		1	1	1	1	2		1	1	1	1	1		1	1	1	1	1		Moderate # of RBCs have "punched out" central pallor and/or Heinz body-like inclusions similar to AA3				Darker staining RBCs.	Very mild echinocytosis; Echinocytes slightly/softly spiculated	Cell rounding 2+; Moisture droplets 2+
Blood	Comm Pract	DD3	2	Air-Dry		2	1	1	2	2		1	1	1	1	2		1	1	1	1	1		1	2	1	1	2		Moderate # of RBCs have "punched out" central pallor and/or Heinz body-like inclusions similar to AA3		RBCs appear to have stained lighter		Light staining RBCs.	Very mild echinocytosis; Echinocytes slightly/softly spiculated	Moisture droplets 2+
Blood	Comm Pract	DD4	4	CoolShot		2	1	1	2	2		1	1	1	1	1		1	1	1	1	1		1	2	1	1	2		Moderate # of RBCs have "punched out" central pallor and/or Heinz body-like inclusions similar to AA3, but some areas are free of artifact				Ligher staining RBCs.	Very mild echinocytosis; Echinocytes slightly/softly spiculated	Cell rounding 2+
Blood	Comm Pract	EE1	1	CoolShot		1	1	1	2	2		1	1	1	3	1		1	1	1	1	1		1	1	1	1	2			HB-like inclusions in moderate #s of RBCs			Darker staining RBCs	Very mild echinocytosis; Echinocytes slightly/softly spiculated; WBCs very poorly preserved, unable to interpret the majority	Cell rounding 2+; Moisture droplets 1+
Blood	Comm Pract	EE2	4	Heat Block		3	2	1	3	3		1	2	1	3	2		1	1	1	1	1		1	1	1	1	2		indistinct RBC morphology, some areas of hemolysis & possible blowing artifact		RBCs clustered on majority of slide and appear dark, difficult to see central pallor; lymphs seem to be mildly distorted		Focal areas where Red cells are in closer proximity. Not close enough close to suspect agglutination, but not as evenly space as other areas. Red cell borders are not as clear. Has a hemolyzed appearance.	Smear of uneven quality - RBCs in the majority of the fields are smudge cells (uninterpretable); Rare fields with more normal looking RBCs; In these fields, echinocytosis is very mild (echinocytes slightly/softly spiculated); WBCs very poorly preserved, unable to interpret the majority	Cell rounding 1+; Moisture droplets 3+
Blood	Comm Pract	EE3	3	Air-Dry		1	1	1	2	2		1	1	1	2	1		1	1	1	1	1		1	1	1	1	1						Lighter staining RBCs	WBCs are slightly poorly preserved, but OK to interpret; Echinocytes are slightly/softly spiculated	Moisture droplets 1+
Blood	Comm Pract	EE4	2	Hair Dryer		1	1	1	2	2		1	1	1	3	2		1	1	1	1	1		1	1	1	2	2				RBCs appear lighter on part of slide		Ligher staining RBCs.	Smear of uneven quality - RBCs in the some fields are distorted (uninterpretable); Most areas in the monolayer are OK to interpret; Echinocytosis is very mild (echinocytes slightly/softly spiculated); WBCs very poorly preserved, unable to interpret the majority	Cell rounding 1+; Moisture droplets 2+
Blood	Comm Pract	FF1	1	Air-Dry		1	1	1	2	3		1	1	1	2	2		1	1	1	1	1		3	3	2	2	3						12 echincoytes/ 100x field. Lighter staining RBCs. Few acanothocytes noted - Likely not drying related	RBCs and WBCs have distorted morphology in occasional fields, but the majority of fields are of good quality (does not affect interpretation); Echinocytes are spiculated; Acanthocytes (3+) and schizocytes (rare) also present	Cell rounding 2+; Moisture droplets 3+
Blood	Comm Pract	FF2	4	Hair Dryer		1	1	1	2	3		1	1	1	3	1		1	1	1	1	1		3	3	2	2	3						10 echinocytes/100x field. Darker staining RBCs.	RBCs have distorted morphology in occasional fields, but the majority of fields are of good quality (does not affect interpretation); WBCs poorly preserved, difficult to evaluate; Echinocytes are spiculated; Acanthocytes (3+) and schizocytes (rare) also present	Cell rounding 2+
Blood	Comm Pract	FF3	2	Heat Block		2	1	1	3	3		1	2	1	3	2		1	1	1	1	1		2	3	1	No data	2		some areas of hemolysis & possible blowing artifact; more lysed WBCs than others?		majority of WBCs look like what is seen in "old" blood		4 echinocytes/hpf. Darker staining RBCs.	Many regions of the smear are severely affected/unreadable; Echinocytes are spiculated; Acanathocytes (3+) and schizocytes (rare) also present, but distorted and difficult to identify	Cell rounding 2+; Moisture droplets 3+
Blood	Comm Pract	FF4	3	CoolShot		1	1	1	2	1		1	1	1	3	1		1	1	1	1	1		3	3	2	2	2						17 echinocytes/hpf. Lighter staining RBCs. Few acanthocytes and rare keratocytes noted.	RBCs have distorted morphology in occasional fields, but the majority of fields are of good quality (does not affect interpretation); WBCs poorly preserved, difficult to evaluate; Echinocytes are spiculated; Acanthocytes (3+) and schizocytes (rare) also present
Blood	SAIM-ECC	GG1	2	CoolShot		1	1	1	1	1		1	1	1	1	1		1	1	1	1	1		1	1	1	1	1						Lighter staining RBCs	No artefact noted
Blood	SAIM-ECC	GG2	1	Hair Dryer		1	1	1	1	2		1	2	1	1	2		1	1	1	1	1		1	1	1	1	1				majority of lymphs look like what is seen in "old" blood		Lighter staining RBCs	No artefact noted	Moisture droplets 2+
Blood	SAIM-ECC	GG3	3	Air-Dry		1	1	2	1	2		1	1	1	1	1		1	1	1	1	1		1	1	1	1	1						RBC are a combination of light and dark staining erythrocytes. Many RBCs (almost 90%) have either 1/4 to 1/2 of the cell stained dark pink/purple while the rest is pale pink. Few cells have polar ends staining darkly with a lighter center.	No artefact noted	Moisture droplets 1+
Blood	SAIM-ECC	GG4	4	Heat Block		1	1	1	1	1		1	1	1	1	1		1	1	1	1	1		1	1	1	1	1						darker staining RBCs	No artefact noted
Blood	SAIM-ECC	HH1	2	Heat Block		3	2	2	3	3		3	1	2	1	2		1	1	1	1	1		1	1	1	1	1		indistinct RBC morphology, some areas of hemolysis & possible blowing artifact: grainy PMNs		RBCs clustered and dark, difficult to see central pallor, halo around RBC's		RBC appera hemolyzed similar to DD2. Darker staining RBCs. Leukocytes - Occasional large lymphocytes have darking staining chromatin and cytoplasm. Chromatin appears to degenerating. Not noted on other HH slides	Smear of uneven quality; RBCs smudged (uninterpretable overall, but some areas worse than others); Other cell lines not affected	Cell rounding 3+; Moisture droplets 3+
Blood	SAIM-ECC	HH2	3	CoolShot		1	1	1	2	1		1	1	1	2	1		1	1	1	1	1		1	1	1	1	1						Darker staining RBCs.	Smear of uneven quality; RBCs and WBCs slightly poorly preserved, but unlikely to interfere with interpretation
Blood	SAIM-ECC	HH3	1	Air-Dry		1	1	2	3	2		1	1	1	1	1		1	1	1	1	1		1	1	1	1	1				RBCs appear to have stained lighter and unevenly		Focal areas have red cells with the previous decribed (GG3) light and dark staining.	Smear of uneven quality; Many RBCs have "moth-eaten" edges and a prominent/"punched out" central pallor and some contain refractile artefact	Refractile artifact 3+
Blood	SAIM-ECC	HH4	4	Hair Dryer		1	1	1	2	2		1	1	1	2	2		1	1	1	1	1		1	1	1	1	1						darker staining RBCs	Smear of uneven quality; Some fields of RBCs are poorly preserved but the majority are intact and interpretable; WBCs slightly poorly preserved, but unlikely to interfere with interpretation	Cell rounding 1+; Moisture droplets 2+; Refractile artifact 1+
Blood	SAIM-ECC	II1	4	Air-Dry		1	1	1	1	2		1	1	1	1	1		1	1	1	1	1		1	1	1	1	2			toxic change			darker staining RBCs		Moisture droplets 2+
Blood	SAIM-ECC	II2	3	Heat Block		1	2	2	3	3		3	1	1	2	2		1	1	1	1	1		1	1	1	1	1		more pronounced toxic change		RBCs contain white spots/vacuoles		RBCs appear to have small 1-5 varialbly sized <1um circular clearings. Occasioanll along the periphery of the cell border - Suspected drying artifact	Smear of uneven quality - RBCs in the majority of the fields are distorted (enough to probably interfere with interpretation - edges are "moth-eaten", central pallor is prominent/"punched out", and some contain refractile artefact); WBCs are slightly poorly preserved, but unlikely to interfere with interpretation	Moisture droplets 3+; Refractile artifact 1+
Blood	SAIM-ECC	II3	2	Hair Dryer		1	1	1	1	1		1	1	1	3	1		1	1	1	1	1		1	1	1	1	1						Lighter staining RBCs	The majority of the WBCs are poorly preserved - difficult to distinguish neutrophils from monocytes. Other cell lines not affected
Blood	SAIM-ECC	II4	1	CoolShot		2	1	1	2	2		1	1	1	2	2		1	1	1	1	1		1	1	1	1	1		patchy areas where RBC morphology is indistinct				lighter staining RBCs	Smear of uneven quality - Occasional small foci of smudged RBCs, but enough fields of intact RBCs that interpretation not affected; WBCs poorly preserved, but unlikely to interfere with interpretation; Echinocytes are slightly/softly spiculated	Cell rounding 1+; Moisture droplets 2+
Blood	SAIM-ECC	JJ1	2	CoolShot		1	1	2	1	2		1	1	1	2	2		1	1	1	1	1		1	1	1	1	1						Darker staining RBCs. Rare facal area of swollen erythocytes with less crisp cell borders.	Smear of uneven quality; WBCs in some focal areas slightly poorly preserved, but unlikely to interfere with interpretation	Cell rounding 1+; Moisture droplets 2+
Blood	SAIM-ECC	JJ2	3	Hair Dryer		1	1	1	1	2		1	1	1	2	1		1	1	1	1	1		1	1	1	1	1						Darker staining RBCs.	Smear of uneven quality; WBCs slightly poorly preserved, but unlikely to interfere with interpretation	Cell rounding 1+
Blood	SAIM-ECC	JJ3	1	Heat Block		1	1	1	1	2		1	1	1	1	1		1	1	1	1	1		1	1	1	1	1						Darker staining erythrocytes.		Refractile artifact 1+
Blood	SAIM-ECC	JJ4	4	Air-Dry		2	1	2	2	2		1	1	1	1	1		1	1	1	1	1		1	1	1	1	1		indistinct RBC morphology in a few areas				Focal area of sllighter staining erytherocytes with fuzzy cell borders (lyzed)	Smear of uneven quality - few small focal areas of smudged RBCs, but unlikely to interfere with interpretation	Cell rounding 1+
Blood	SAIM-ECC	KK1	3	Air-Dry		2	1	1	3	2		1	1	1	2	2		1	1	1	1	1		1	1	1	1	1		a few areas have indistinct RBCs or possible blowing artifact				Darker staining RBCs	Smear of uneven quality - RBCs in the majority of the fields are distorted (enough to probably interfere with interpretation - edges are "moth-eaten", central pallor is prominent/"punched out", and some contain refractile artefact); WBCs are slightly poorly preserved, but unlikely to interfere with interpretation	Moisture droplets 2+; Refractile artifact 2+
Blood	SAIM-ECC	KK2	2	Heat Block		1	1	1	2	2		1	1	1	1	1		1	1	1	1	1		1	1	1	1	1						Darker staining RBCs.	RBCs in the majority of the fields are slightly distorted (central pallor is often prominent/"punched out", some contain refractile artefact, and edges of some RBCs are "moth-eaten"), but unlikely to interfere with interpretation	Refractile artifact 2+
Blood	SAIM-ECC	KK3	4	CoolShot		1	1	1	2	1		1	1	1	1	1		1	1	1	1	1		1	1	1	1	1						Lighter staining RBCs	Smear of uneven quality - few small focal areas of smudged RBCs, but unlikely to interfere with interpretation
Blood	SAIM-ECC	KK4	1	Hair Dryer		2	1	1	2	2		1	1	1	2	1		1	1	1	1	1		1	1	1	1	1		a large round lacuna				Ligher staining RBCs.	RBCs in the majority of the fields are slightly distorted (central pallor is often prominent/"punched out" and edges of some RBCs are "moth-eaten" and/or contain refractile artefact), but unlikely to interfere with interpretation; WBCs slightly poorly preserved, but unlikely to interfere with interpretation	Refractile artifact 1+
Blood	SAIM-ECC	LL1	1	Air-Dry		2	1	2	2	2		1	1	1	1	2		1	1	1	1	1		1	1	1	1	2						Darker staining RBCs. Rare focal area of swollen erythocytes with less crisp cell borders. Not close enough to suspect agglutination	Smear of uneven quality - few small focal areas of smudged RBCs, but unlikely to interfere with interpretation; Echinocytes are slightly/softly spiculated	Cell rounding 1+; Moisture droplets 2+, Refractile artifact 1+; ecchinocytes not evely distributed (1+ versus 2+), but on average appear 2+
Blood	SAIM-ECC	LL2	3	CoolShot		1	1	1	2	2		1	1	1	2	1		1	1	1	1	1		1	1	1	1	2						Darker staining staining. 1 ehinocyte/hpf.	Smear of uneven quality - few small focal areas of smudged RBCs and rare areas with RBCs containing refractile artefact/"punched out" central pallor), but unlikely to interfere with interpretation; A minority of WBCs are slightly poorly preserved, but unlikely to interfere with interpretation	Cell rounding 1+; Moisture droplets 1+; ecchinocytes not evely distributed (1+ versus 2+), but on average appear 2+
Blood	SAIM-ECC	LL3	2	Heat Block		1	1	1	2	2		1	1	1	2	1		1	1	1	1	1		1	2	1	1	1						Lighter staining RBCs	Many RBCs have prominent/"punched out" central pallor and a few contain refractile artefact, but unlikely to interfere with interpretation; A minority of WBCs are slightly poorly preserved, but unlikely to interfere with interpretation	Refractile artifact 1+
Blood	SAIM-ECC	LL4	4	Hair Dryer		1	1	1	2	2		1	1	1	3	1		1	1	1	1	1		1	1	1	2	2							Overall RBCs are slightly poorly preserved, but unlikely to interfere with interpretation; Roughly half of WBCs are poorly preserved, likely to interfere with interpretation; Echinocytes are slightly/softly spiculated	Cell rounding 1+; Refractile artifact 1+
Effusion Fluid	Misc	MM1	4	Air-Dry		1	1	1	No data	3		1	1	1	No data	1		Not applicable (no platelets observed)						Not applicable (no echinocytosis scoring on effusion fluid smears)							very low cellularity; poor cellular preservation @ feathered edge				Very low cellularity - difficult to evaluate cells	Cell rounding 1+; Refractile artifact 3+	Methods 2 and 4 slides were pretty low cellularity, so may have been thinner preps
Effusion Fluid	Misc	MM2	1	CoolShot		1	1	1	No data	2		1	1	1	No data	1																			Very low cellularity - difficult to evaluate cells	Cell rounding 1+; monolayer area was low cellularity; most cells were in the thick sample droplet area. RBC artifacts were most pronounced in this thick area
Effusion Fluid	Misc	MM3	2	Hair Dryer		1	1	1	No data	2		1	1	1	No data	1																			Very low cellularity - difficult to evaluate cells	Cell rounding 1+; Refractile artifact 1+
Effusion Fluid	Misc	MM4	3	Heat Block		1	1	1	No data	2		1	1	1	No data	1																			Very low cellularity - difficult to evaluate cells	Cell rounding 1+; Refractile artifact 1+
Effusion Fluid	Misc	NN1	4	Hair Dryer		1	1	1	No data	2		1	1	1	No data	1															very low cellularity; poor cellular preservation @ feathered edge				Very low cellularity - difficult to evaluate cells	Cell rounding 1+; Refractile artifact 1+
Effusion Fluid	Misc	NN2	2	Heat Block		1	1	1	No data	3		1	1	1	No data	1																			Very low cellularity - difficult to evaluate cells	Cell rounding 1+; Refractile artifact 2+
Effusion Fluid	Misc	NN3	3	CoolShot		1	1	1	No data	2		1	1	1	No data	1																			Very low cellularity - difficult to evaluate cells	Cell rounding 1+; Refractile artifact 1+
Effusion Fluid	Misc	NN4	1	Air-Dry		1	1	1	No data	3		1	1	1	No data	1																			Very low cellularity - difficult to evaluate cells	Cell rounding 3+; Refractile artifact 1+
Effusion Fluid	Misc	OO1	1	Heat Block		1	1	1	No data	2		1	1	1	No data	1															cells are mostly at feathered edge & disrupted				Cells poorly preserved across samples - suspect sample effect, rather than drying artefact	Refractile artifact 1+
Effusion Fluid	Misc	OO2	4	Air-Dry		1	1	1	No data	2		1	1	1	No data	1																			Cells poorly preserved across samples - suspect sample effect, rather than drying artefact	Refractile artifact 1+
Effusion Fluid	Misc	OO3	2	CoolShot		1	1	1	No data	2		1	1	1	No data	1																			Cells poorly preserved across samples - suspect sample effect, rather than drying artefact	Refractile artifact 1+
Effusion Fluid	Misc	OO4	3	Hair Dryer		1	2	1	No data	1		1	1	1	No data	1																Most RBCs are crenated and/or have white spots/vacuoles			Cells poorly preserved across samples - suspect sample effect, rather than drying artefact
Effusion Fluid	Misc	PP1	2	CoolShot		1	1	1	No data	1		1	1	1	No data	1															very low cellularity				Very low cellularity - difficult to evaluate cells
Effusion Fluid	Misc	PP2	3	Hair Dryer		1	1	1	No data	2		1	1	1	No data	1																			Very low cellularity - difficult to evaluate cells	Cell rounding 1+
Effusion Fluid	Misc	PP3	1	Air-Dry		1	1	1	No data	3		1	1	1	No data	1																			Very low cellularity - difficult to evaluate cells	Cell rounding 2+
Effusion Fluid	Misc	PP4	4	Heat Block		2	1	1	No data	3		1	1	1	No data	1														refractile artifact in many RBCs					Very low cellularity - difficult to evaluate cells	Cell rounding 2+; Refractile artifact 2+
Effusion Fluid	Misc	QQ1	1	CoolShot		1	1	1	No data	1		1	2	1	No data	1															very low cellularity; poor cellular preservation @ feathered edge	cytoplasm on WBCs disturbed/didn't stain			Very low cellularity - difficult to evaluate cells
Effusion Fluid	Misc	QQ2	4	Heat Block		1	1	2	No data	3		1	1	1	No data	1																		occasional circular clearings within erythrocytes - drying artifact	Very low cellularity - difficult to evaluate cells	Refractile artifact 2+
Effusion Fluid	Misc	QQ3	2	Hair Dryer		1	1	1	No data	1		1	1	1	No data	1																			Very low cellularity - difficult to evaluate cells
Effusion Fluid	Misc	QQ4	3	Air-Dry		1	1	1	No data	3		1	1	1	No data	1														unable to focus @ 50x obj					Very low cellularity - difficult to evaluate cells	Cell rounding 2+; Refractile artifact 1+
Effusion Fluid	Misc	RR1	3	Heat Block		2	1	1	No data	3		1	1	1	No data	1														refractile artifact in many RBCs	cells are mostly at feathered edge & disrupted				Cells poorly preserved across samples - suspect sample effect, rather than drying artefact	Cell rounding 2+; Refractile artifact 1+
Effusion Fluid	Misc	RR2	1	Hair Dryer		2	1	1	No data	3		1	1	1	No data	1														refractile artifact in some RBCs					Very low cellularity (virtually acellular) - difficult to evaluate cells	Cell rounding 1+; Refractile artifact 2+
Effusion Fluid	Misc	RR3	4	CoolShot		1	1	1	No data	2		1	1	1	No data	1																			Cells poorly preserved across samples - suspect sample effect, rather than drying artefact	Cell rounding 1+; Refractile artifact 1+
Effusion Fluid	Misc	RR4	2	Air-Dry		1	2	1	No data	3		1	1	1	No data	2																RBCs have halo around them not present in other smears from this sample; * there appear to be less WBCs in body of smear			Cells poorly preserved across samples - suspect sample effect, rather than drying artefact	Cell rounding 3+; Moisture droplets 1+; Refractile artifact 1+
																																					General Notes on my scoring: I graded artifacts on a scale of 1+ to 3+ (mild to severe), and included: 1) Cell rounding: RBCs appear rounded, balled-up, and denser without central pallor, making it difficult to assess morphology (e.g. spherocytes). This was typically present throughout the entire slide, so I felt it did affect my diagnostic interpretation. 2) Moisture droplets: multifocal demarca…
